# Supplementary material
Source: PubMed Central journal article supplement (PMC11129873)
Supplement: NIHMS1992796-supplement-Figure_S5.pdf [file NIHMS1992796-supplement-Figure_S5.pdf]

A

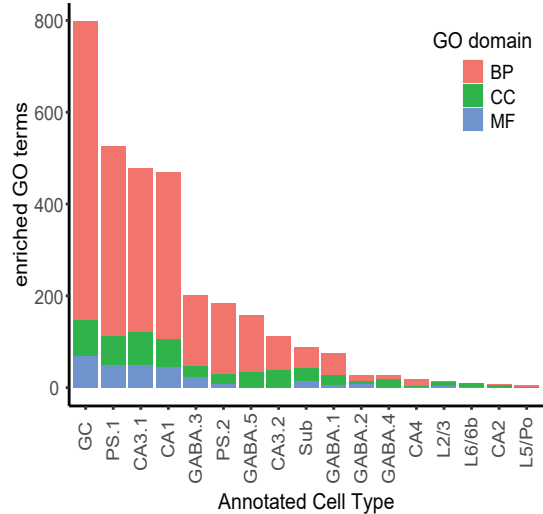

B

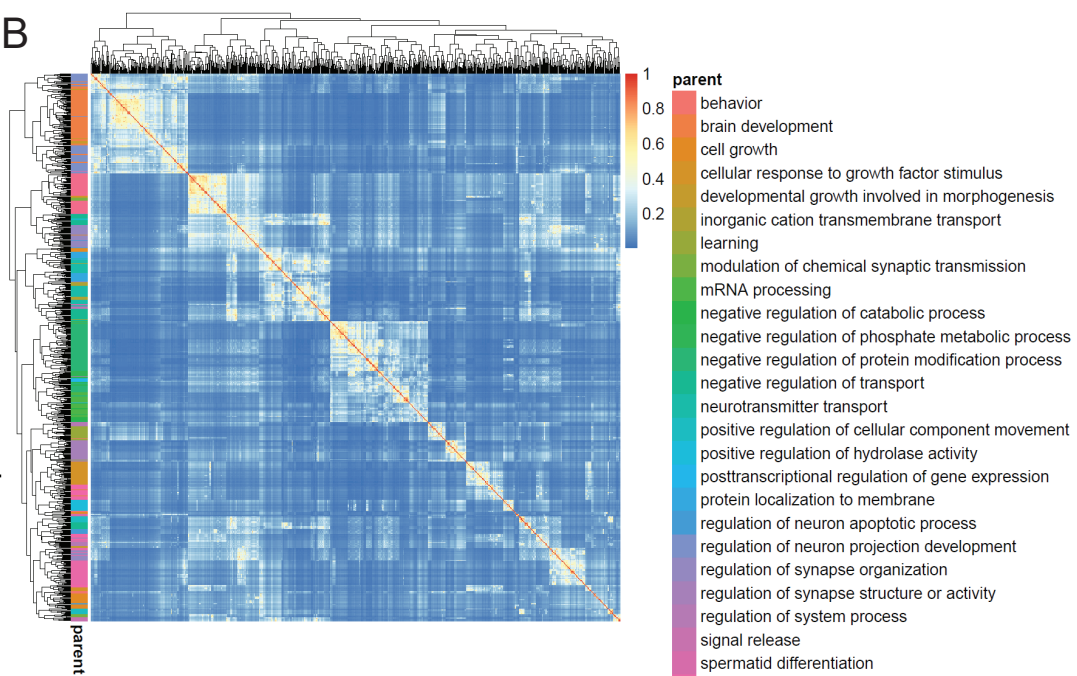

C

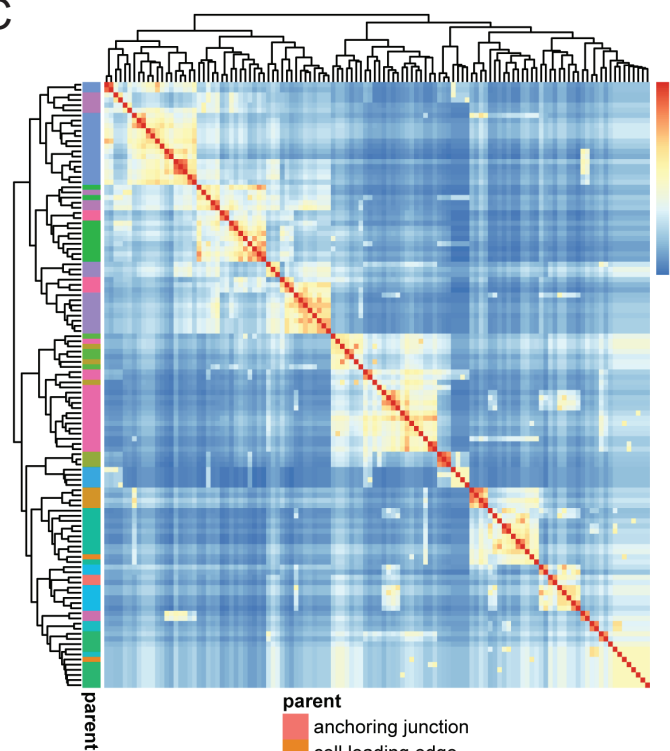

parent

- anchoring junction
- cell leading edge
- cilium
- cytoplasmic side of plasma membrane
- ion channel complex
- membrane microdomain
- mitochondrial protein-containing complex
- myelin sheath
- neuron spine
- neuronal cell body
- presynapse
- receptor complex
- ribosome
- secretory vesicle
- spliceosomal complex
- supramolecular fiber
- synaptic membrane
- vesicle membrane

D

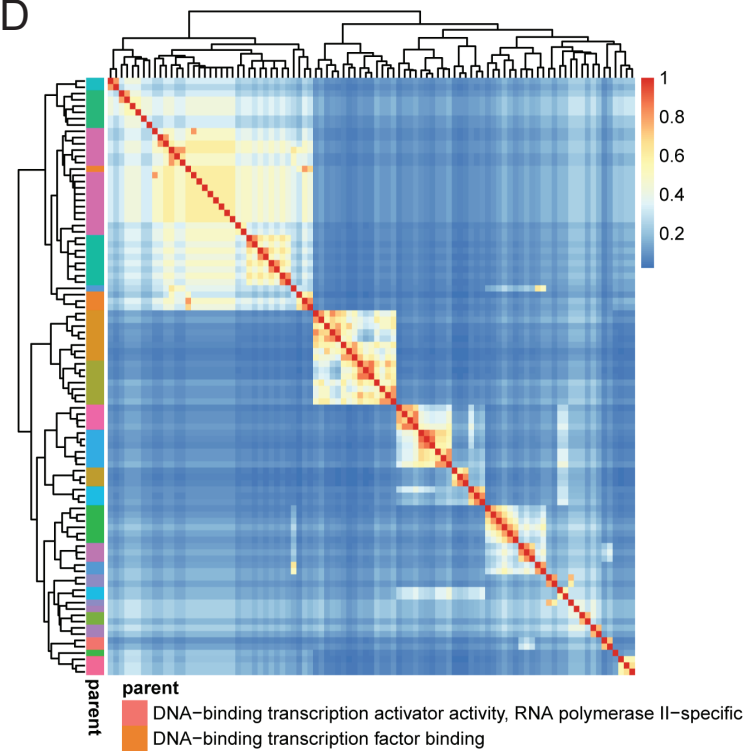

parent

- DNA-binding transcription activator activity, RNA polymerase II-specific
- DNA-binding transcription factor binding
- gated channel activity
- helicase activity
- metal ion transmembrane transporter activity
- molecular adaptor activity
- mRNA binding
- nucleoside-triphosphatase regulator activity
- peptide binding
- phosphatase binding
- phospholipid binding
- phosphoprotein phosphatase activity
- protein kinase activity
- signaling receptor activator activity
- signaling receptor activity
- structural constituent of ribosome
- transcription coregulator activity
- transmembrane transporter binding
- ubiquitin-protein transferase activity
- zinc ion binding
