# Supplementary material
Source: PubMed Central journal article supplement (PMC11129873)

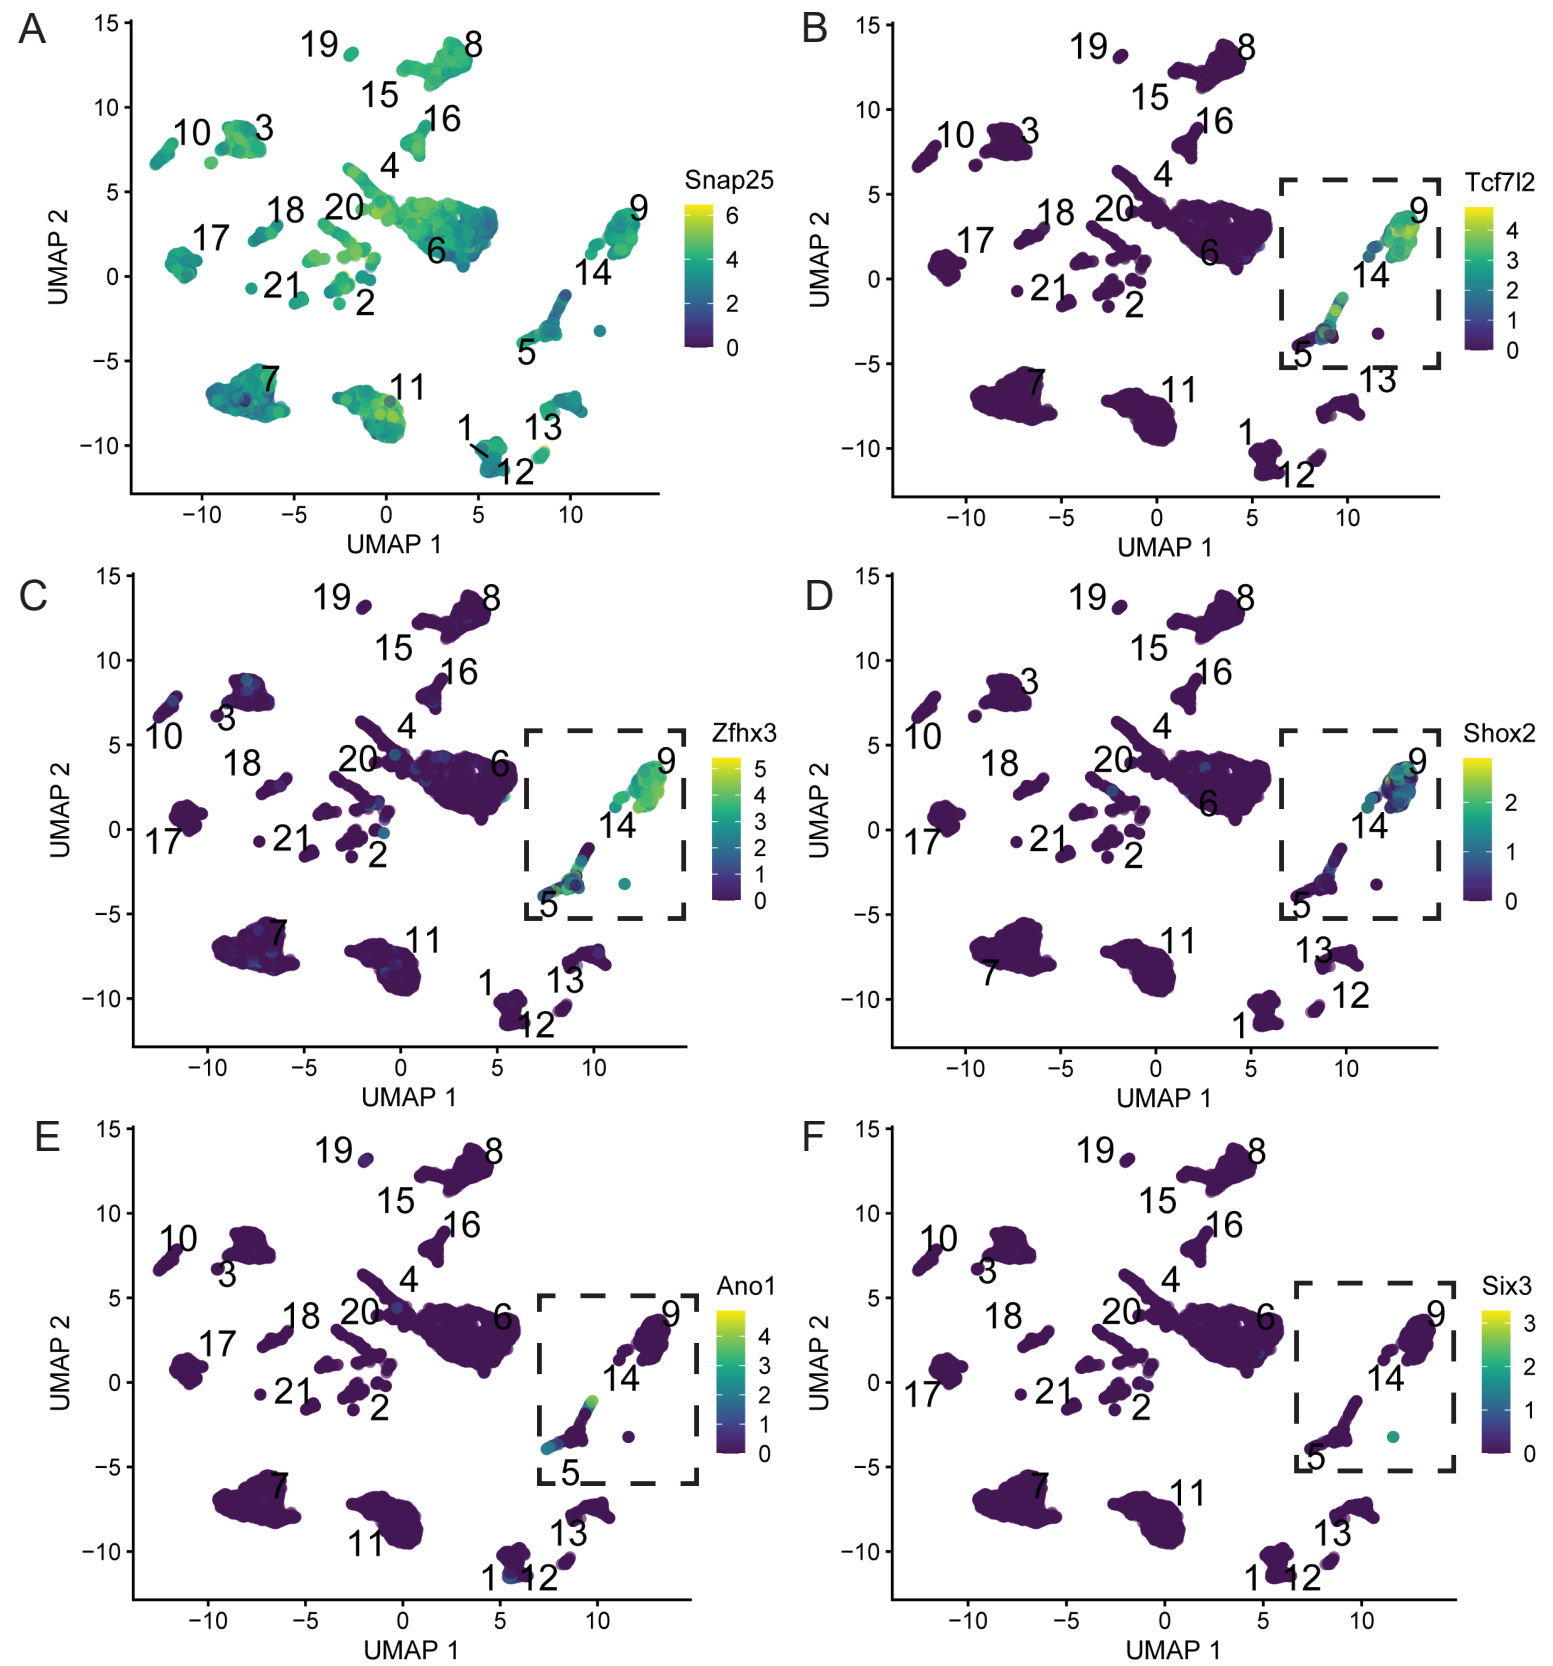

Supplement: NIHMS1992796-supplement-Figure_S1.pdf [file NIHMS1992796-supplement-Figure_S1.pdf]

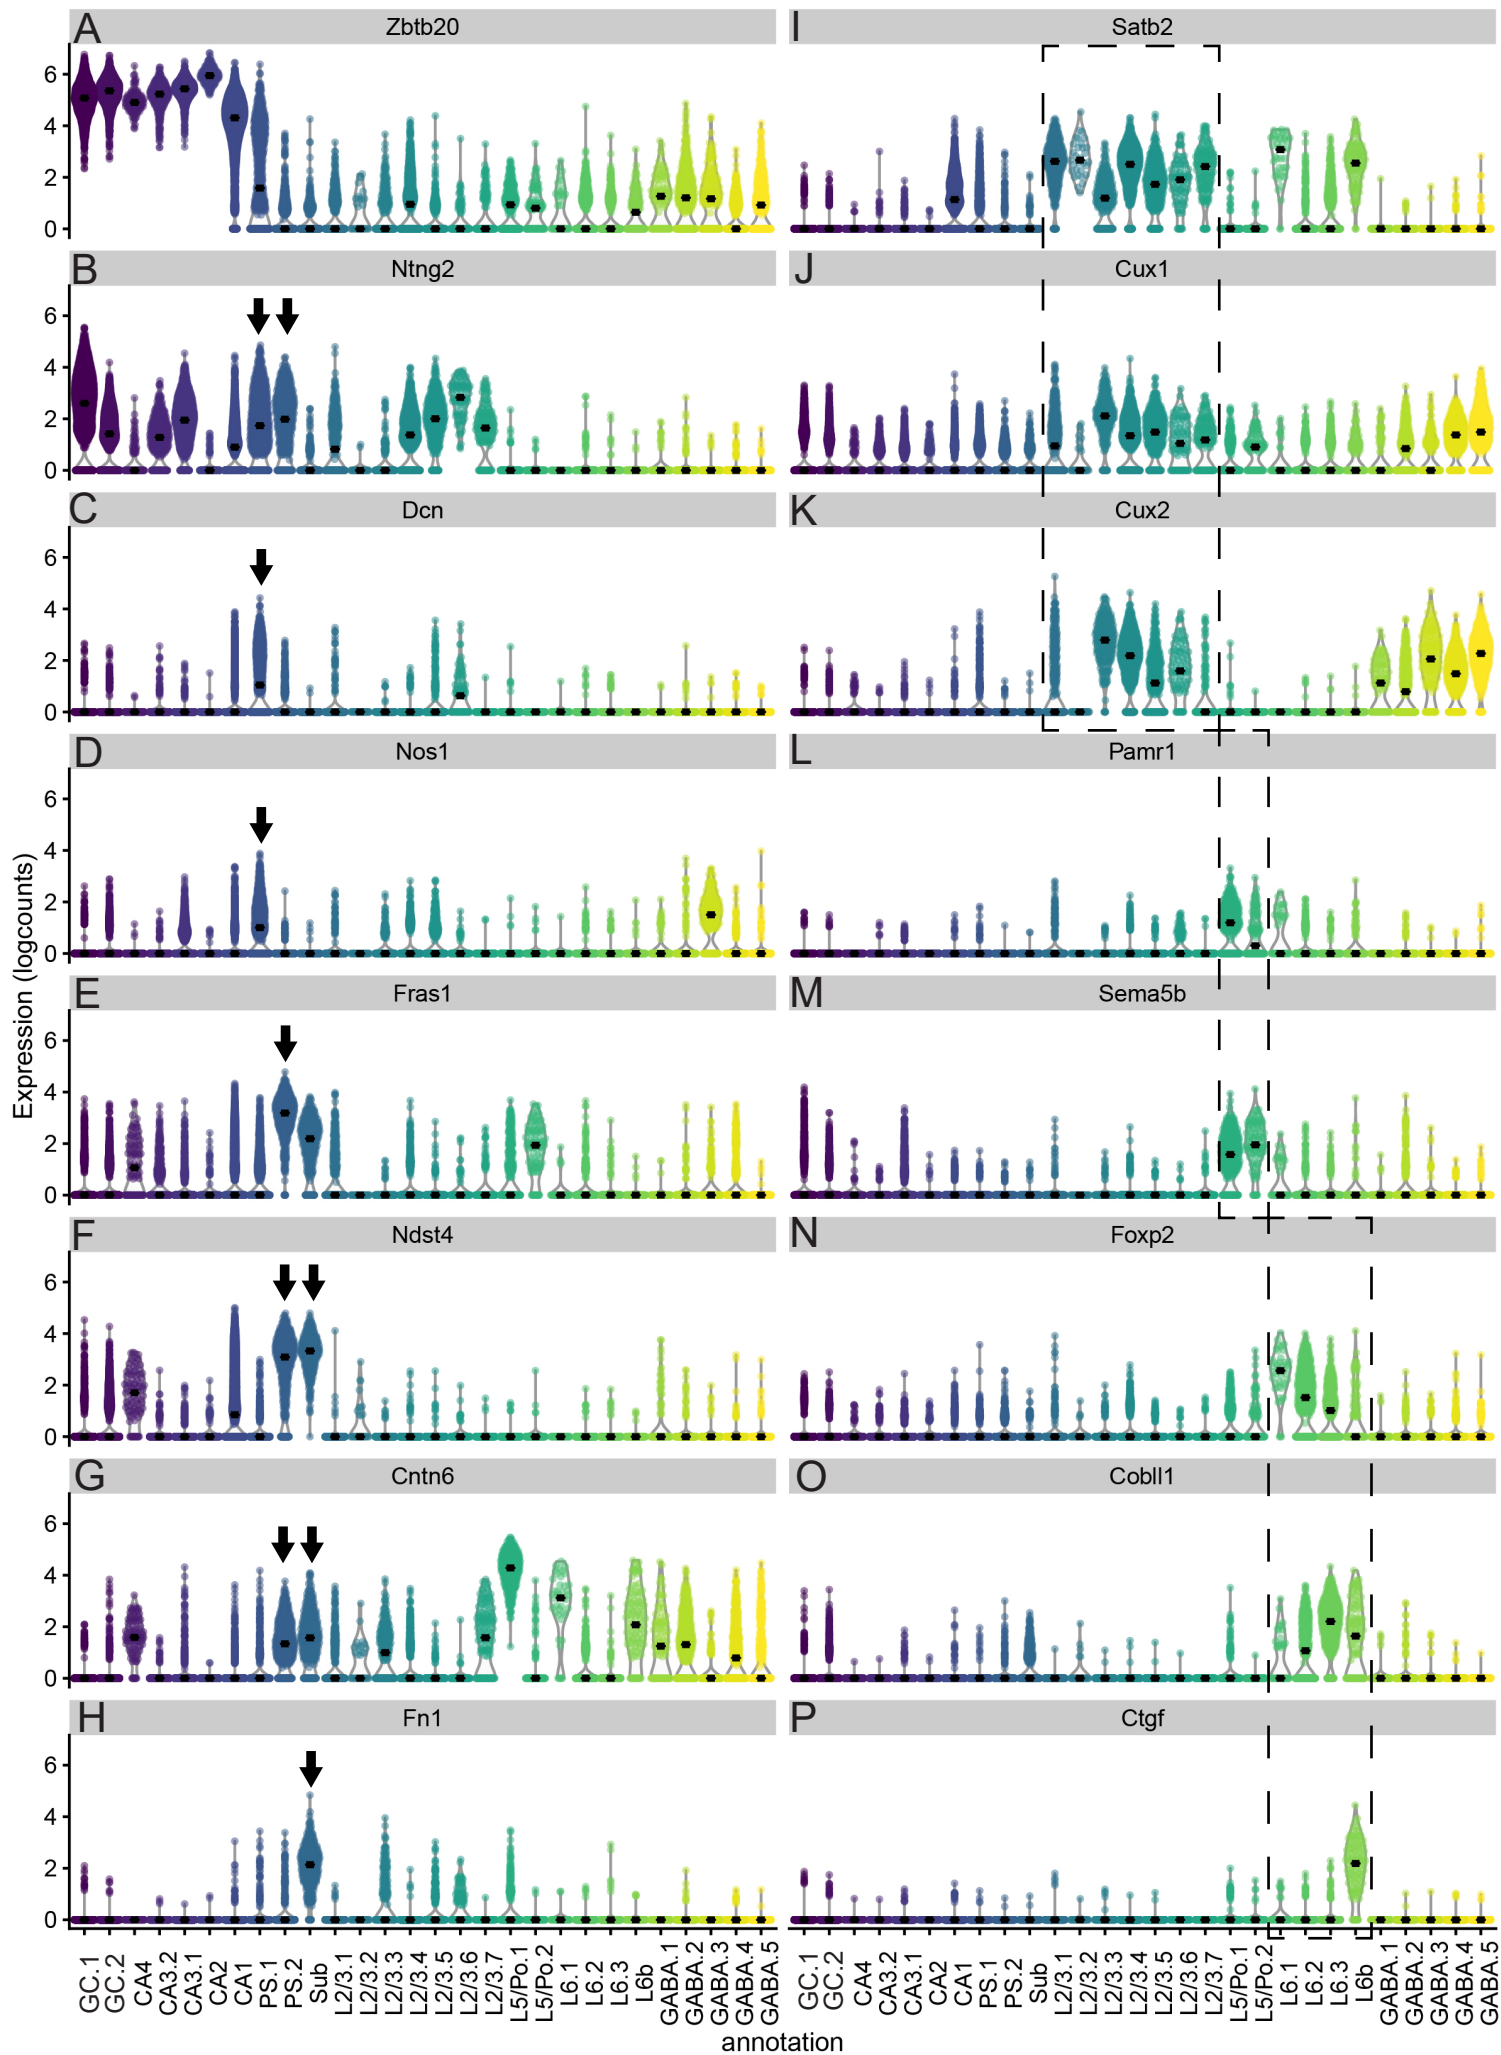

Supplement: NIHMS1992796-supplement-Figure_S2.pdf [file NIHMS1992796-supplement-Figure_S2.pdf]

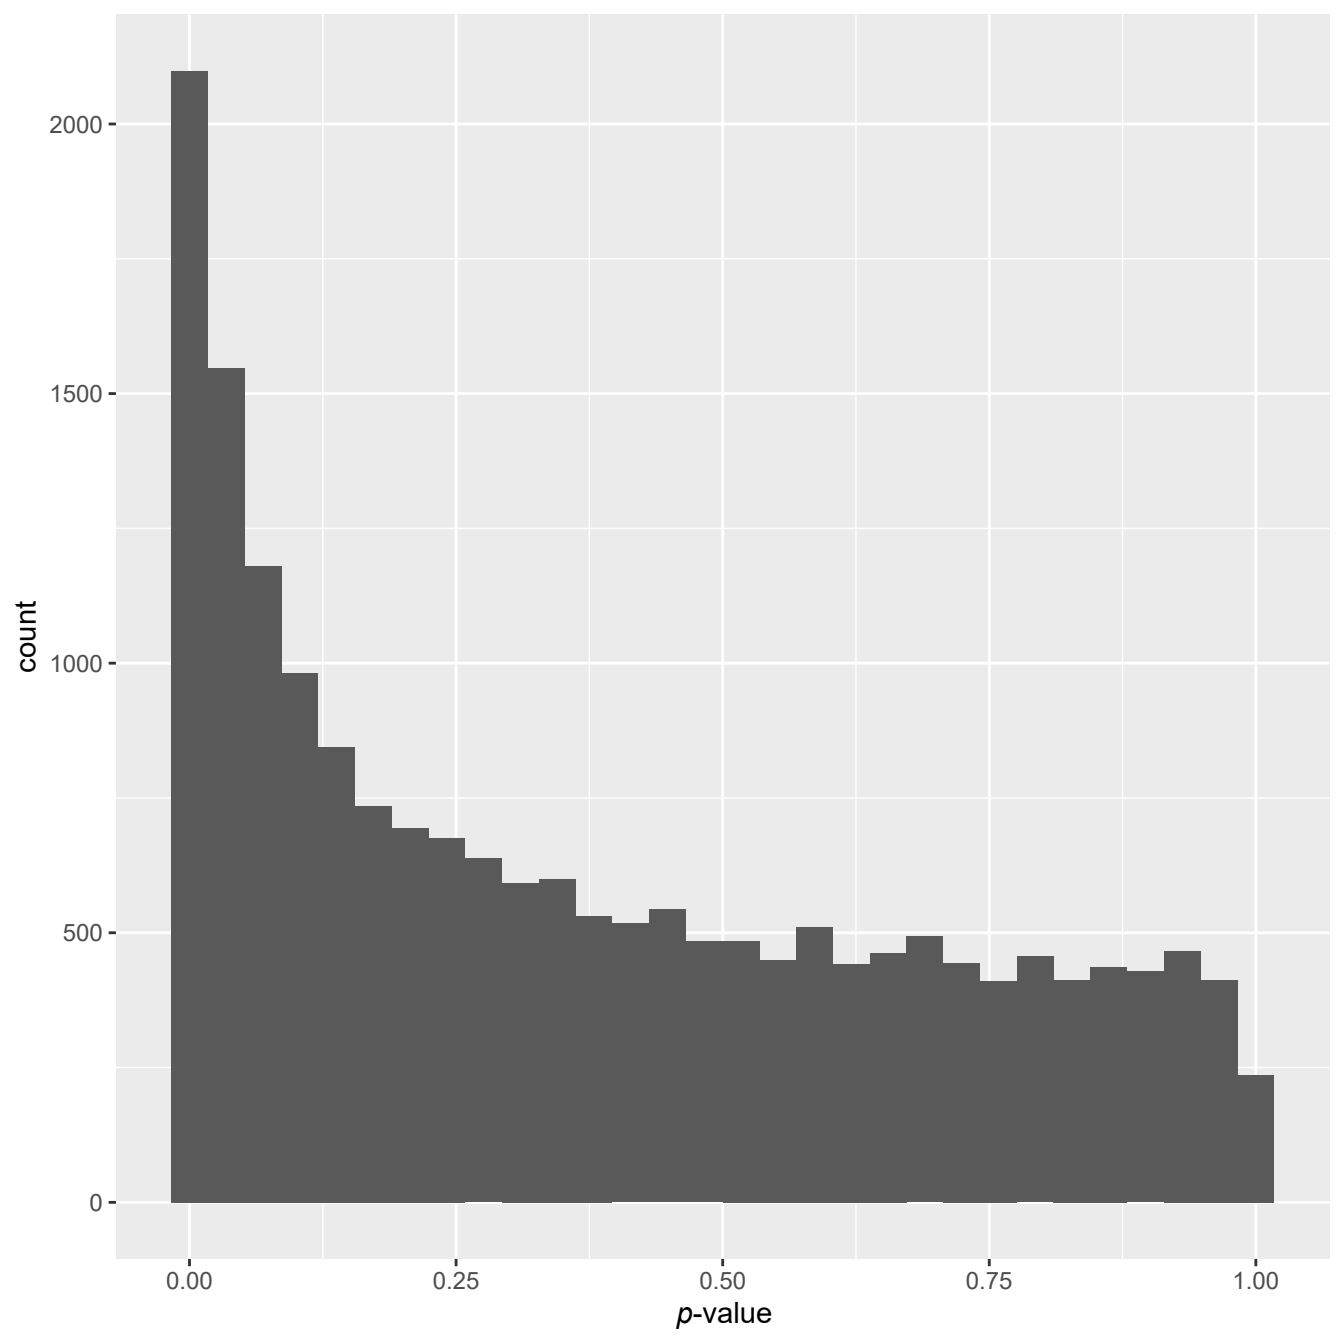

Supplement: NIHMS1992796-supplement-Figure_S3.pdf [file NIHMS1992796-supplement-Figure_S3.pdf]

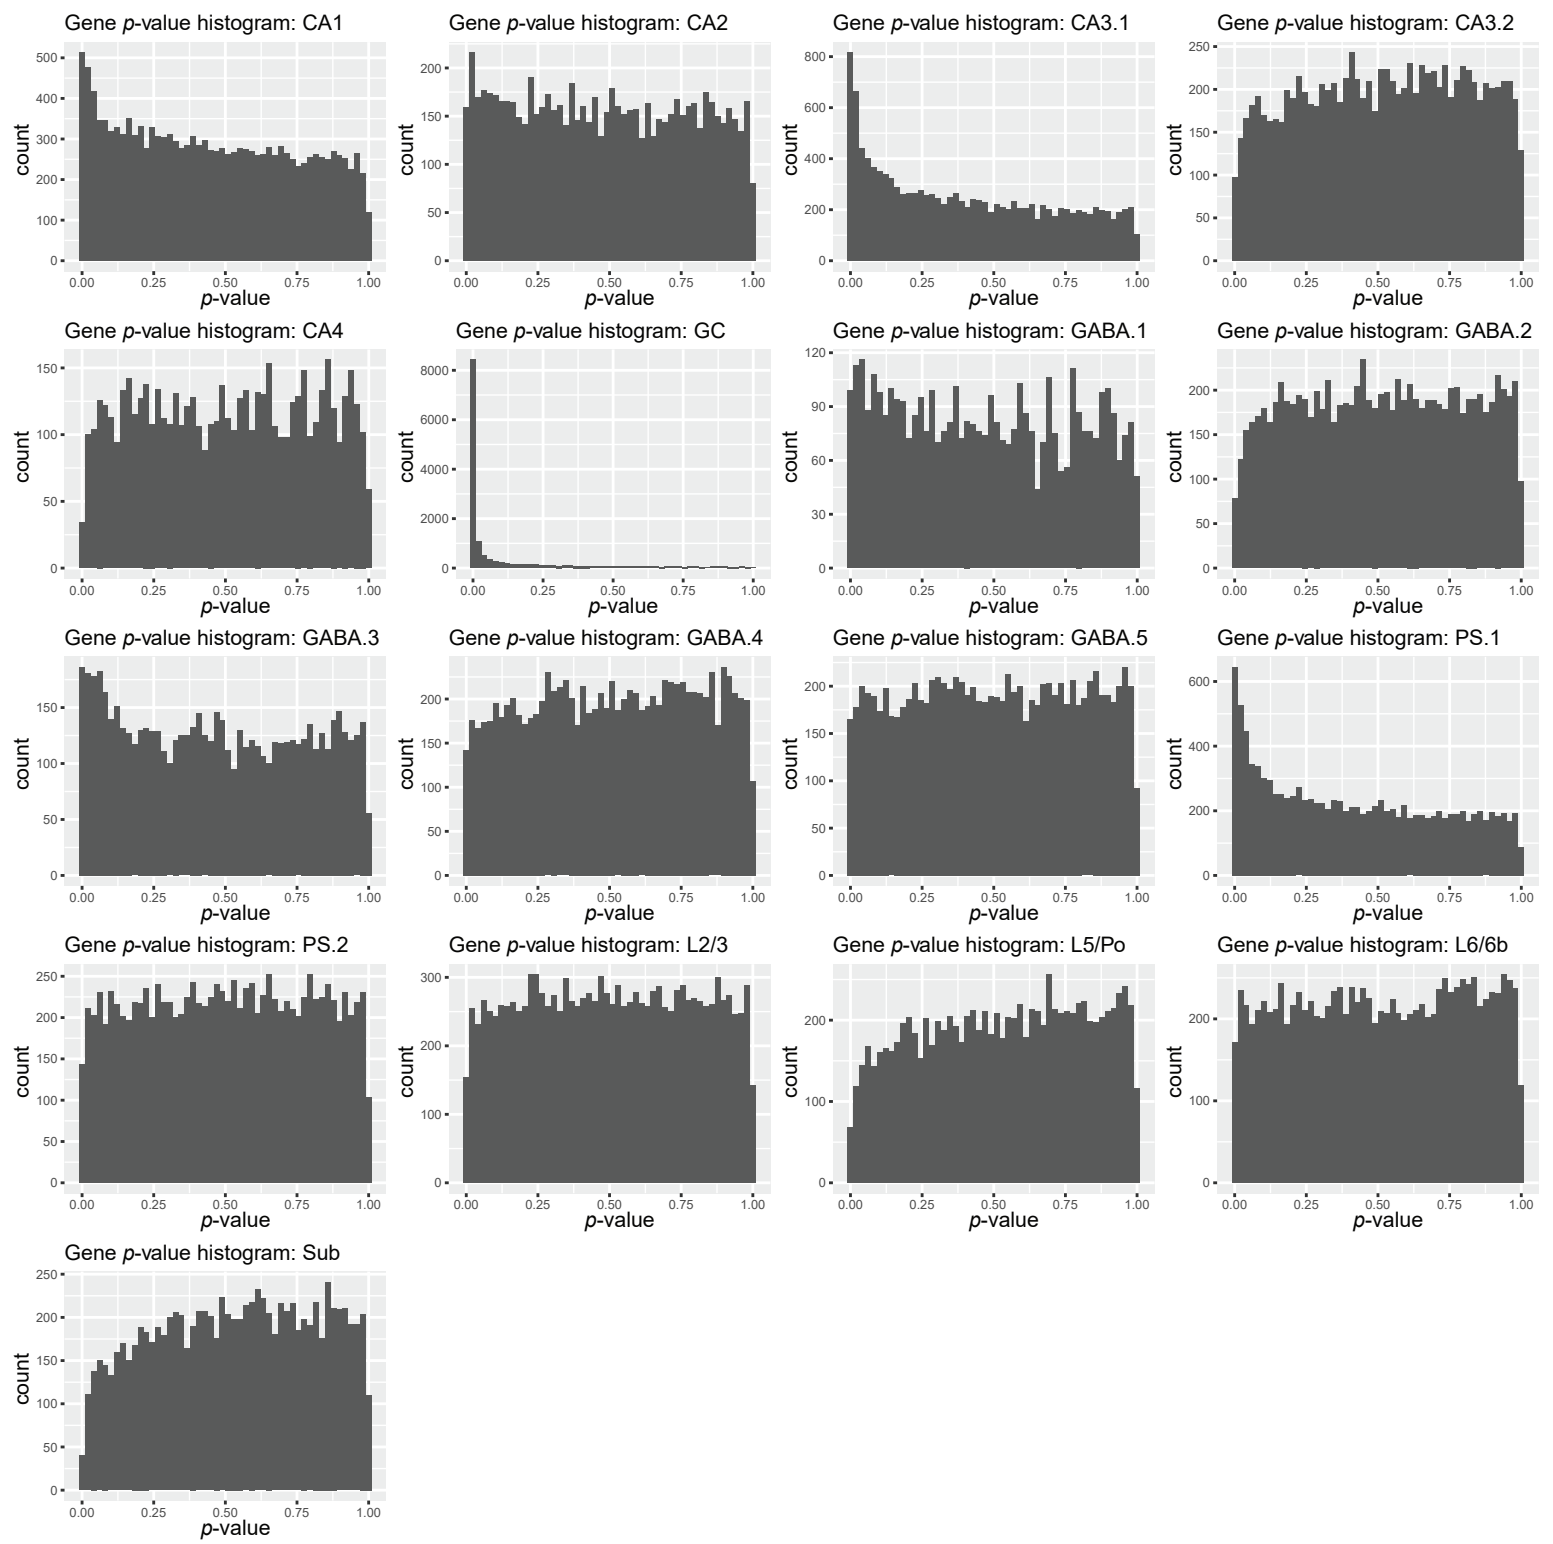

Supplement: NIHMS1992796-supplement-Figure_S4.pdf [file NIHMS1992796-supplement-Figure_S4.pdf]

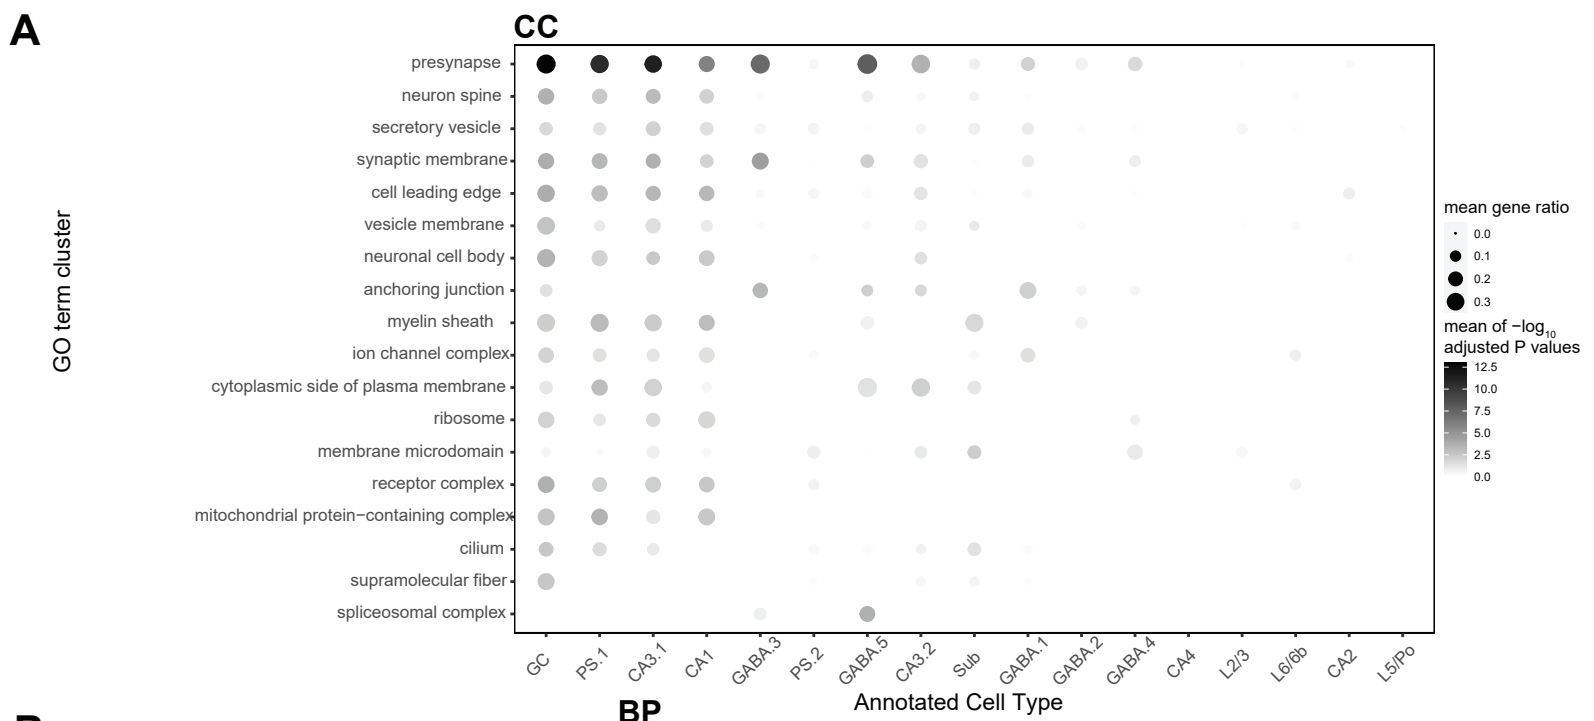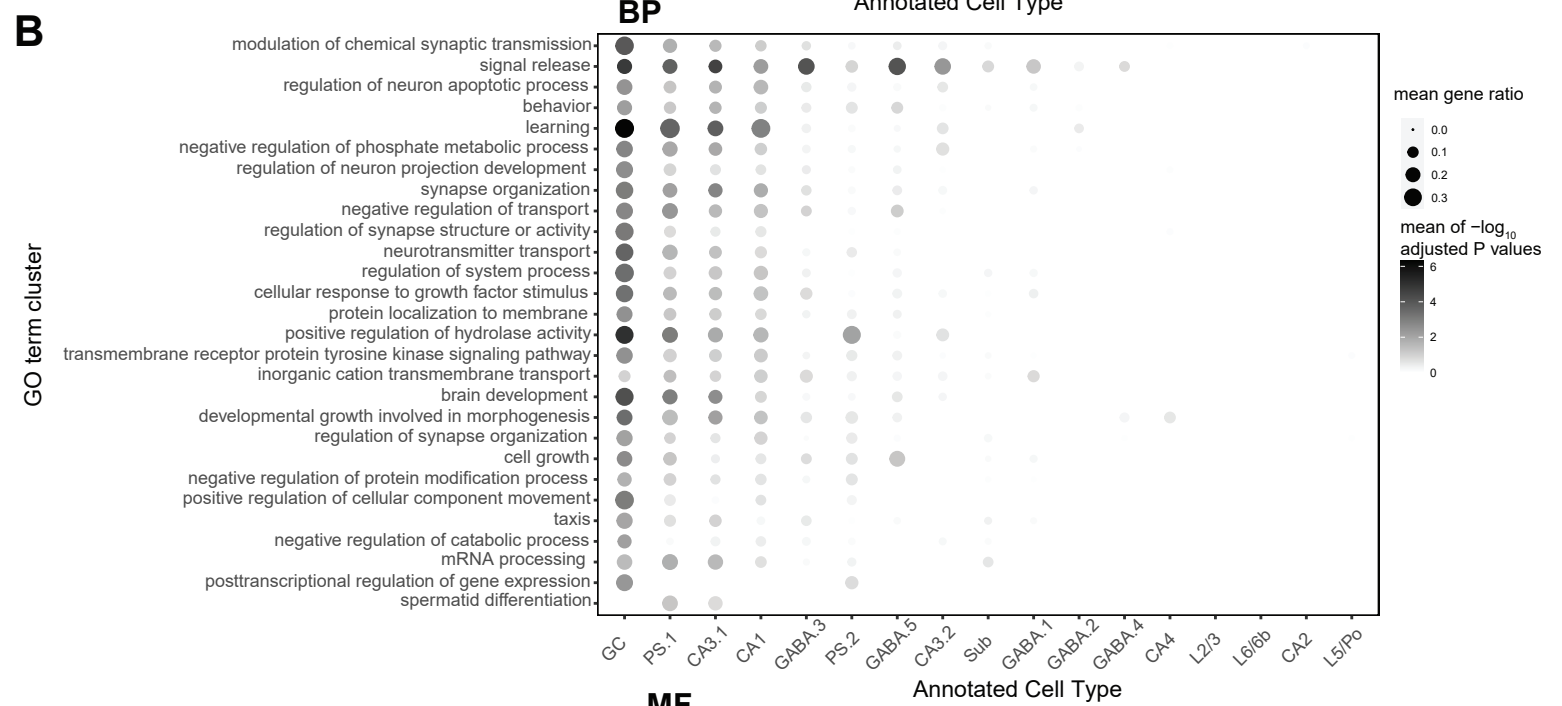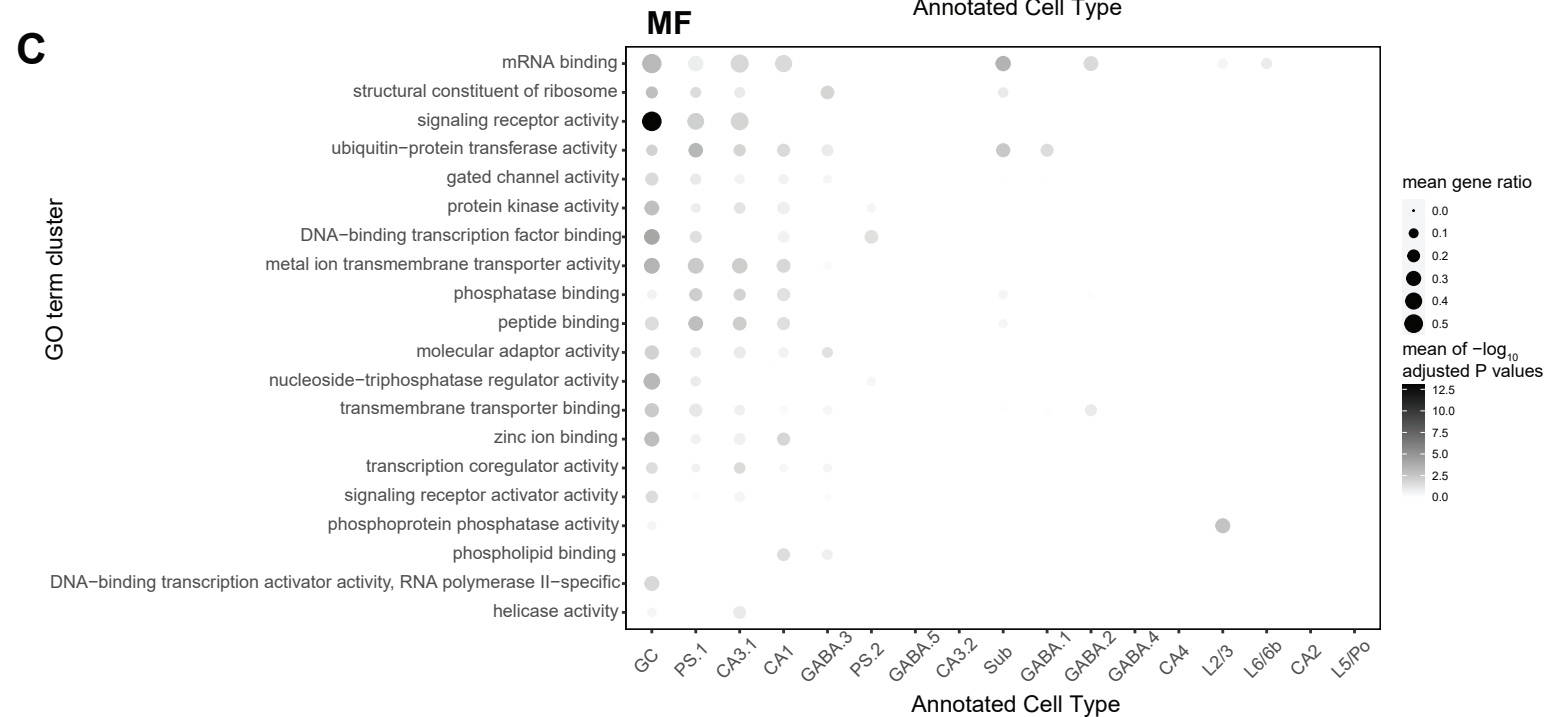

Supplement: NIHMS1992796-supplement-Figure_S6.pdf [file NIHMS1992796-supplement-Figure_S6.pdf]
